# Supplementary material for: Psychiatric inpatient care for persons with dissociative identity disorder: a scoping review protocol
Source: HighWire-hosted journal article supplement (doi:10.1136/bmjopen-2023-079207), 2024-02-01
Supplement: bmjopen-2023-079207supp001_data_supplement.pdf [file bmjopen-2023-079207supp001_data_supplement.pdf]

|                                           |                     |
|-------------------------------------------|---------------------|
| Supplemental table 1. Data charting table | RQ5                 |
|                                           | RQ4                 |
|                                           | RQ3                 |
|                                           | RQ2                 |
|                                           | RQ1                 |
|                                           | Quality             |
|                                           | Discipline          |
|                                           | Design              |
|                                           | Aim                 |
|                                           | Setting             |
|                                           | Population          |
|                                           | Country             |
|                                           | Year of publication |
|                                           | Authors             |
